# Supplementary material
Source: Springer Nature journal article supplement (https://www.springermedizin.de/resource/supplementary/12990_2011_384_MOESM6_ESM.pdf/9613166)

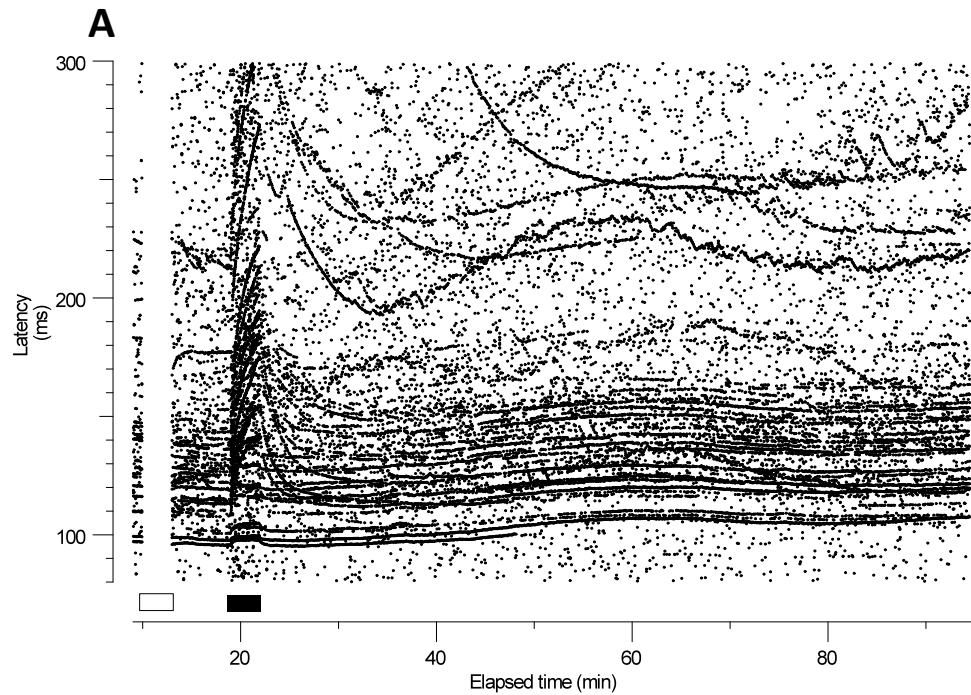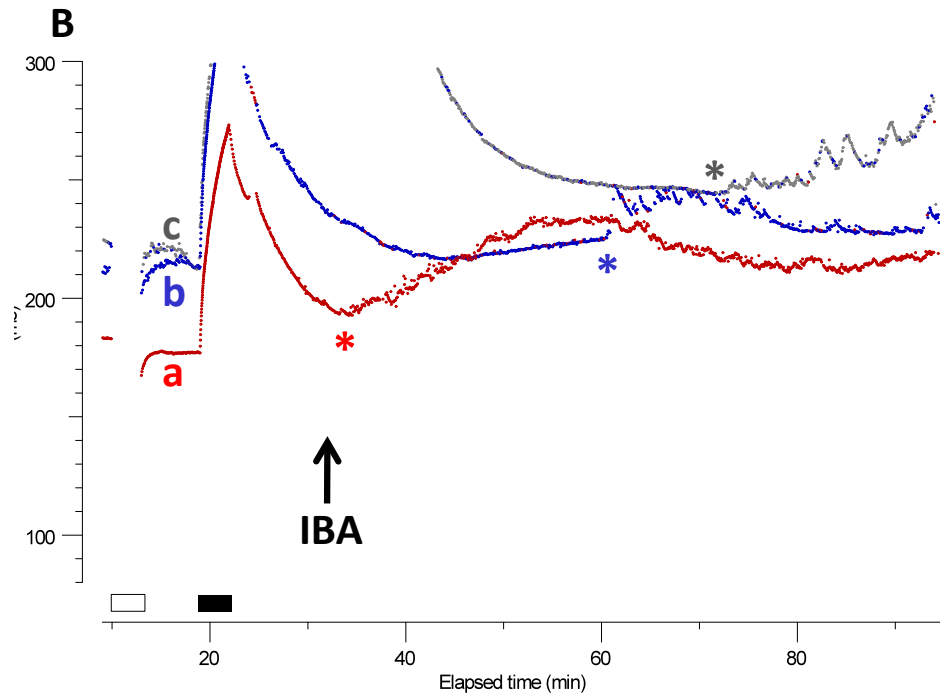

Supplement: MOESM6 [file 9613166]
